# Supplementary material for: Structural Characterization of a Polysaccharide from Gastrodia elata and Its Bioactivity on Gut Microbiota
Source: MDPI journal article supplement (doi:10.3390/molecules26154443), 2021-07-23

## *Pages of Supplementary Material for Article*

### **Structural characterization of a polysaccharide from *Gastrodia elata* and its bioactivity on gut microbiota**

by

Jiangyan Huo <sup>1,2,†</sup>, Min Lei <sup>1,2,†</sup>, Feifei Li <sup>1,2</sup>, Jinjun Hou <sup>1,2</sup>, Zijia Zhang <sup>1,2</sup>, Huali Long <sup>1,2</sup>, Xianchun Zhong <sup>1,2</sup>, Yameng Liu <sup>1,2</sup>, Cen Xie <sup>1,2,\*</sup> and Wanying Wu <sup>1,2,\*</sup>

<sup>1</sup> Shanghai Research Center for Modernization of Traditional Chinese Medicine, National Engineering Laboratory for TCM Standardization Technology, Shanghai Institute of Materia Medica, Chinese Academy of Sciences, Shanghai 201203, China

<sup>2</sup> University of Chinese Academy of Sciences, Beijing 100049, China

\* Correspondence: xiecen@simm.ac.cn (C.X.); wanyingwu@simm.ac.cn (W.W.)

† These authors contributed equally to this work.

The BPI chromatogram (A) and MS/MS spectra of 10HA in GEP-1 hydrolysate in negative mode (B).

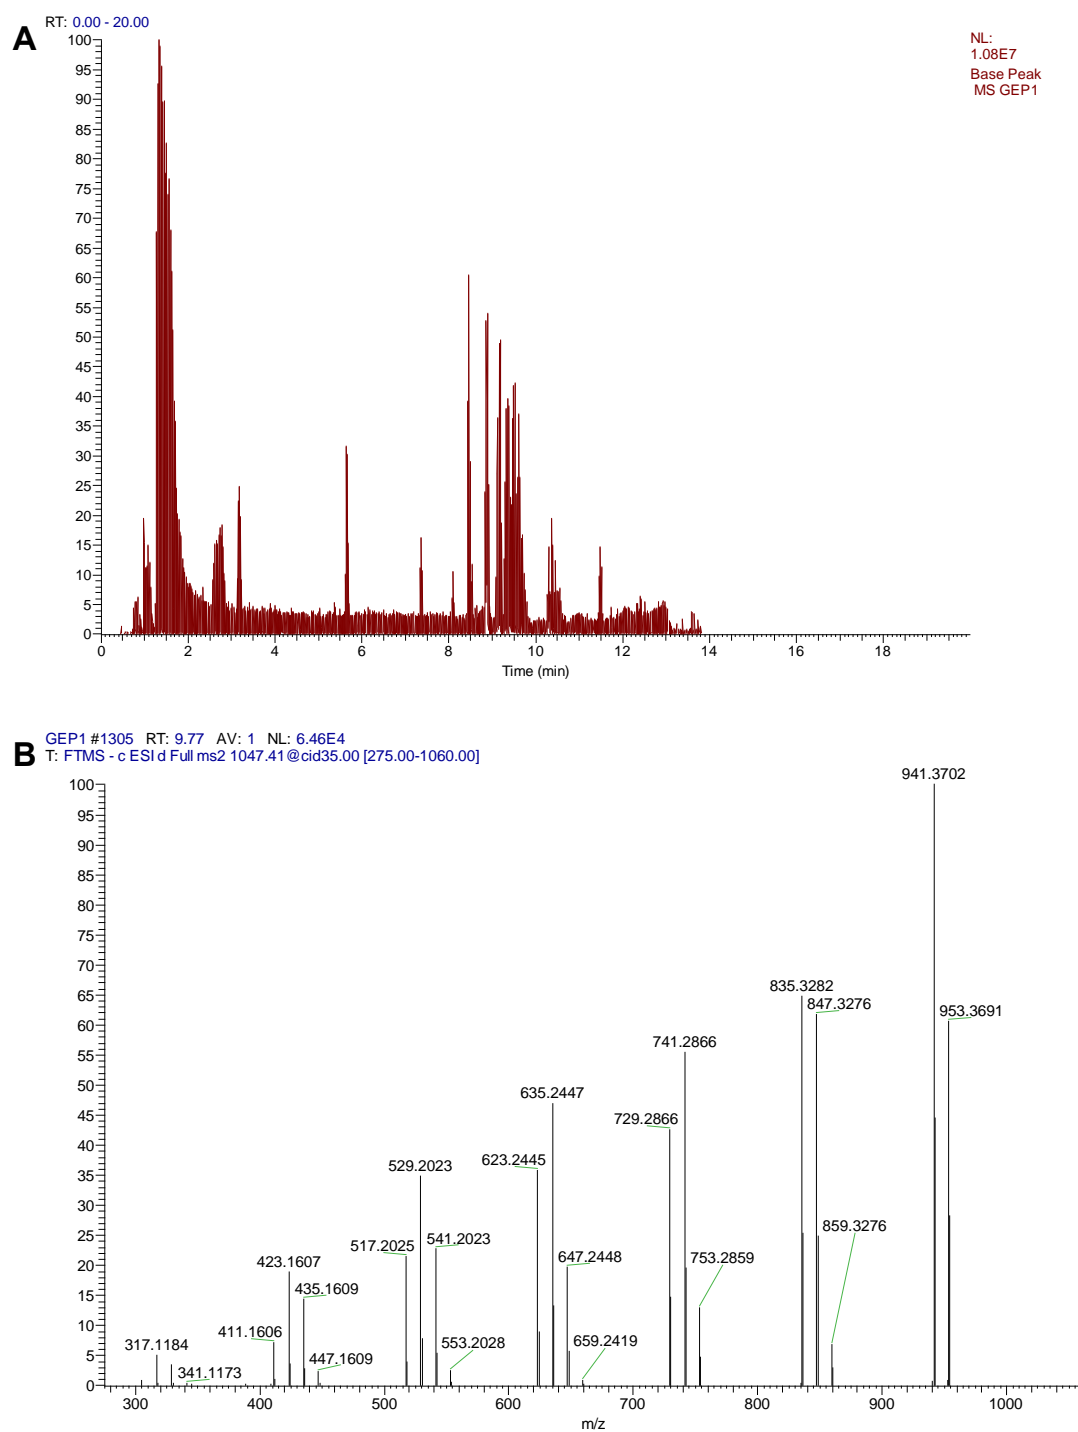

The mass spectra of PMAAs derived from **GEP-1**.

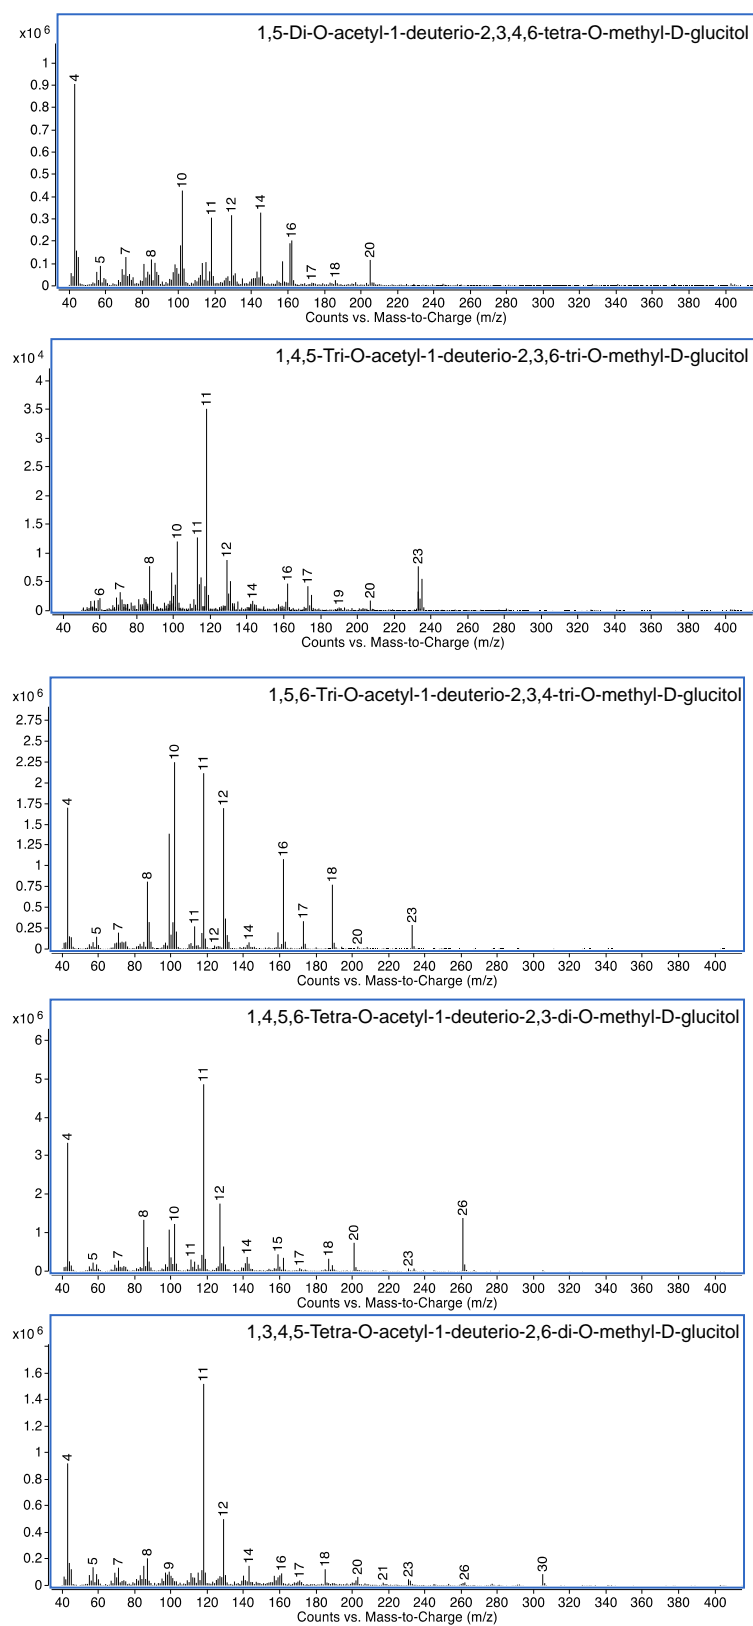

SM 3

Figure 3

$^1\text{H}$  and  $^{13}\text{C}$  NMR spectra of **GEP-1**.

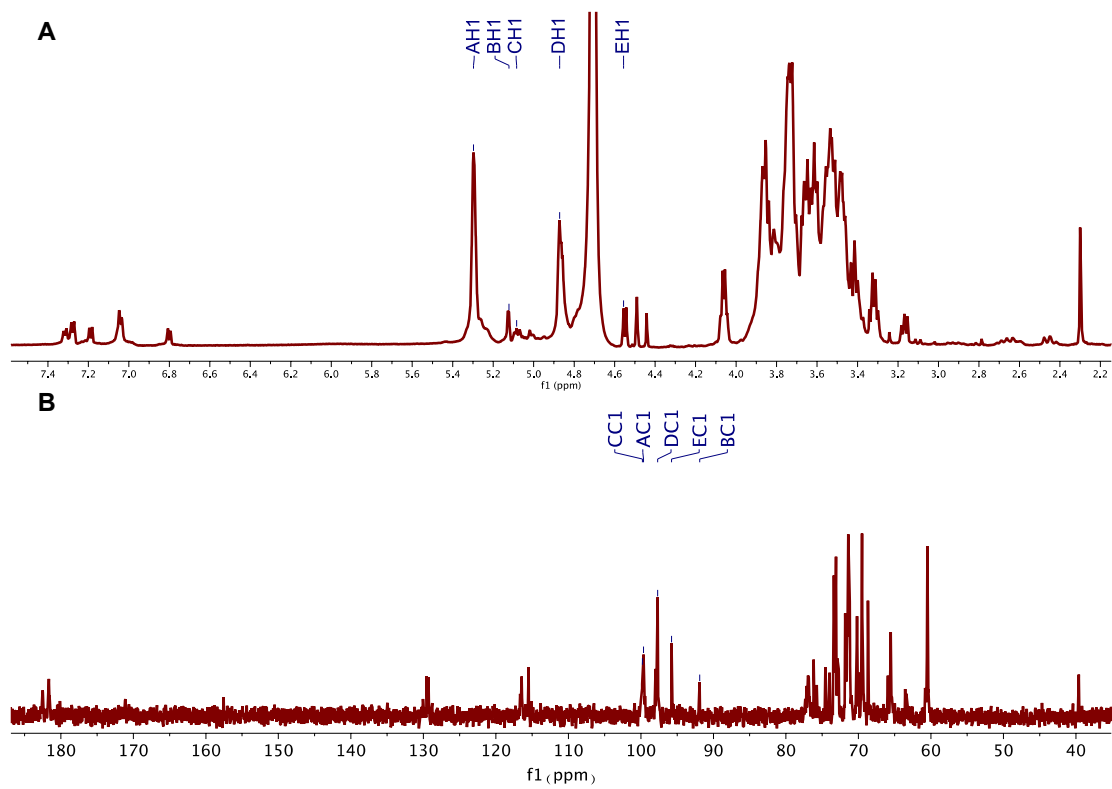

Supplement: s1 [file s1]
